# Supplementary material for: Sequence variants in ARHGAP15, COLQ and FAM155A associate with diverticular disease and diverticulitis
Source: PubMed Central journal article supplement (PMC5467205; doi:10.1038/ncomms15789), 2017-06-06
Supplement: ncomms15789-s1.pdf [file ncomms15789-s1.pdf]

Supplementary Figure 1. Effect of sequence variants on the expression of *ARHGAP15* in white blood cells by RNA sequencing.

a) *ARHGAP15* transcripts

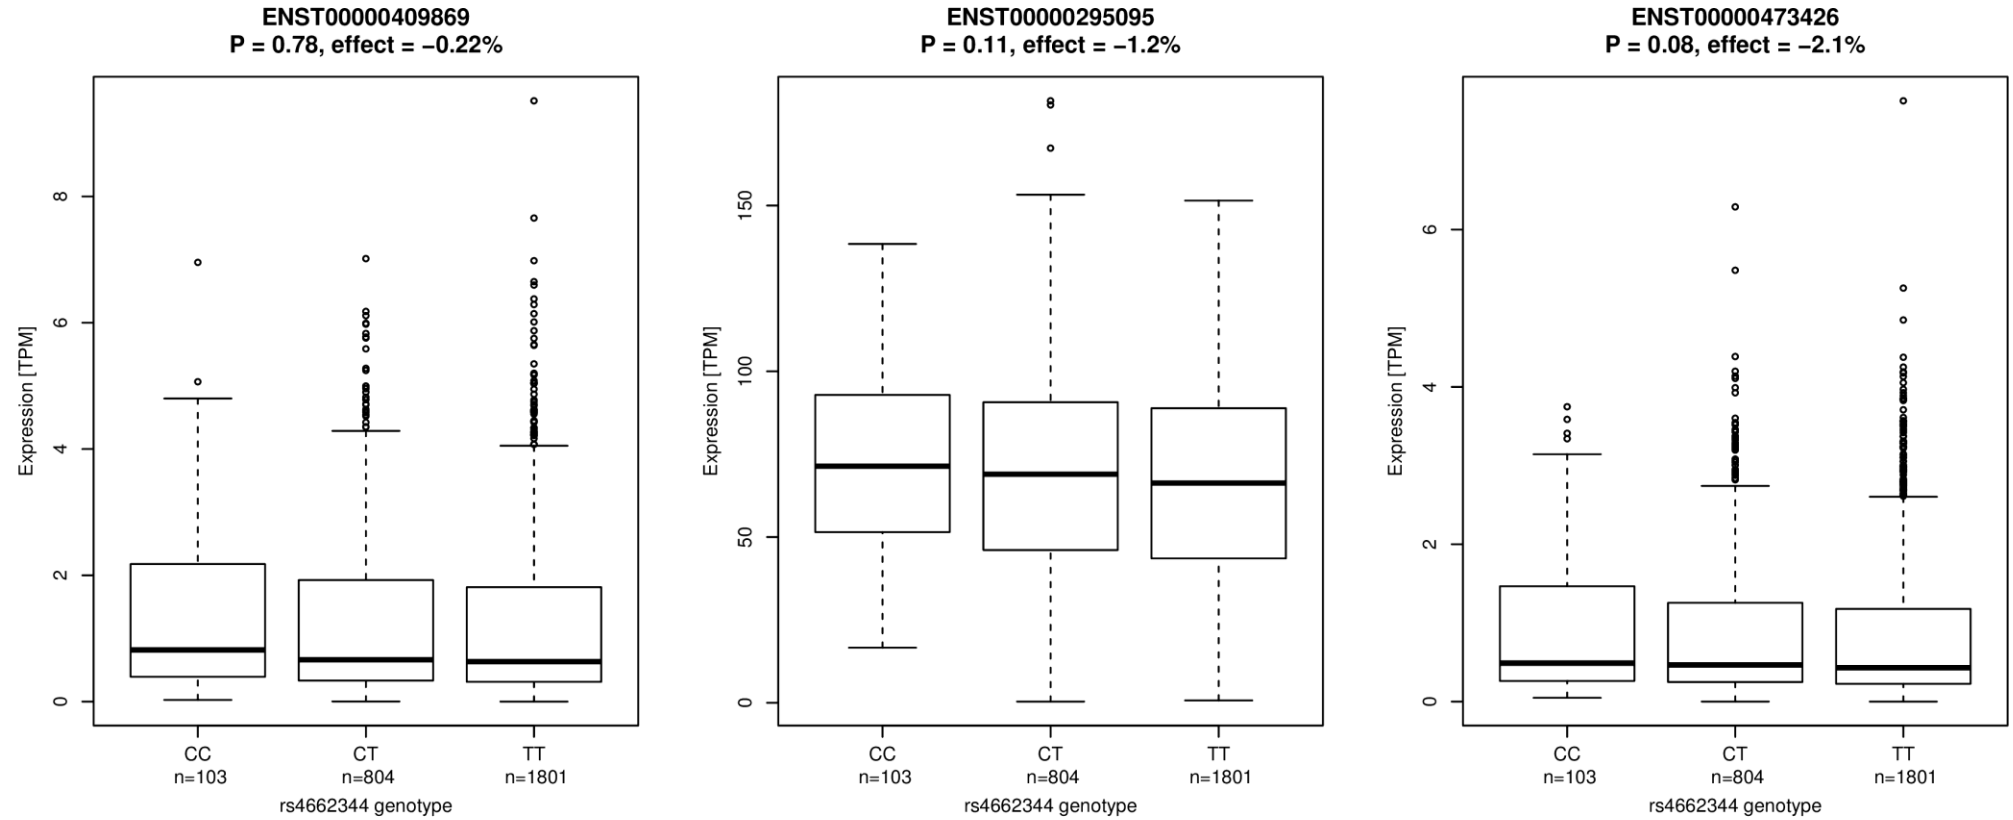

**b) *ARHGAP15* exons**

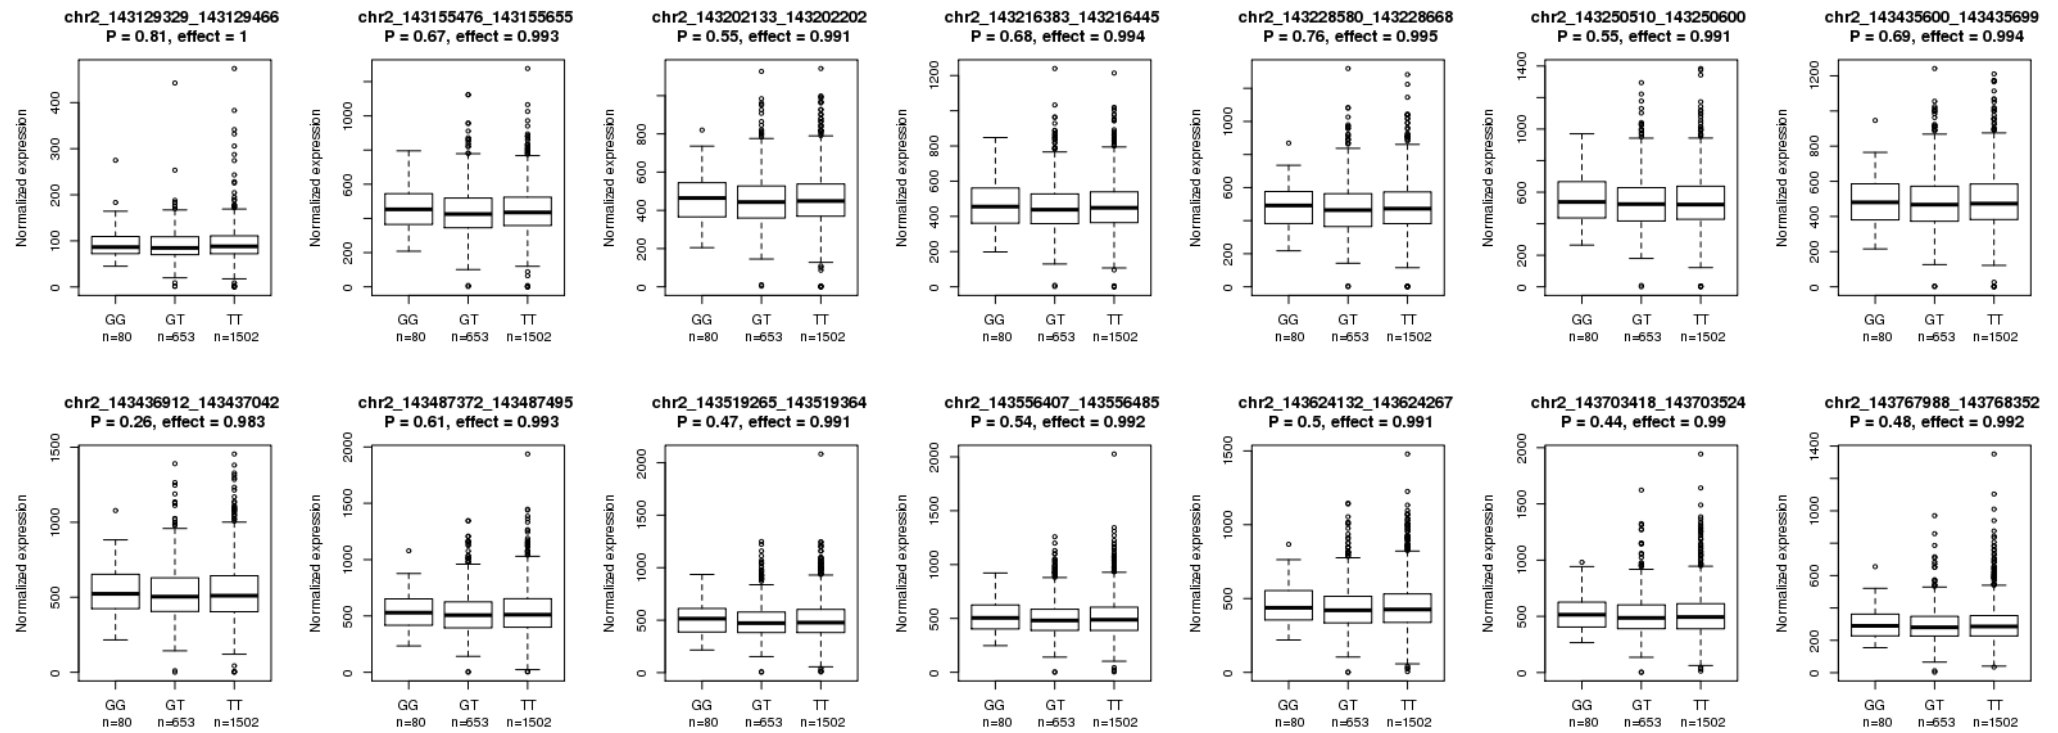

The RNAseq expression in whole blood for different transcripts and each exon is plotted for carriers of wild type, heterozygotes and homozygotes for the associated sequence variant. A line indicates the median, the box 25th and 75th percentiles of the distribution and the whiskers indicate the 95% confidence interval. A) Expression of three *ARHGAP15* transcripts from 2,708 individuals plotted for the sequence variant rs4662344. B) *ARHGAP15* expression, from 2,246 individuals, plotted for the sequence variant rs7607879 (LD with lead SNP  $r^2 > 0.98$ )

Supplementary Figure 2. The effect of *ARHGAP15* sequence variants on ROS production.

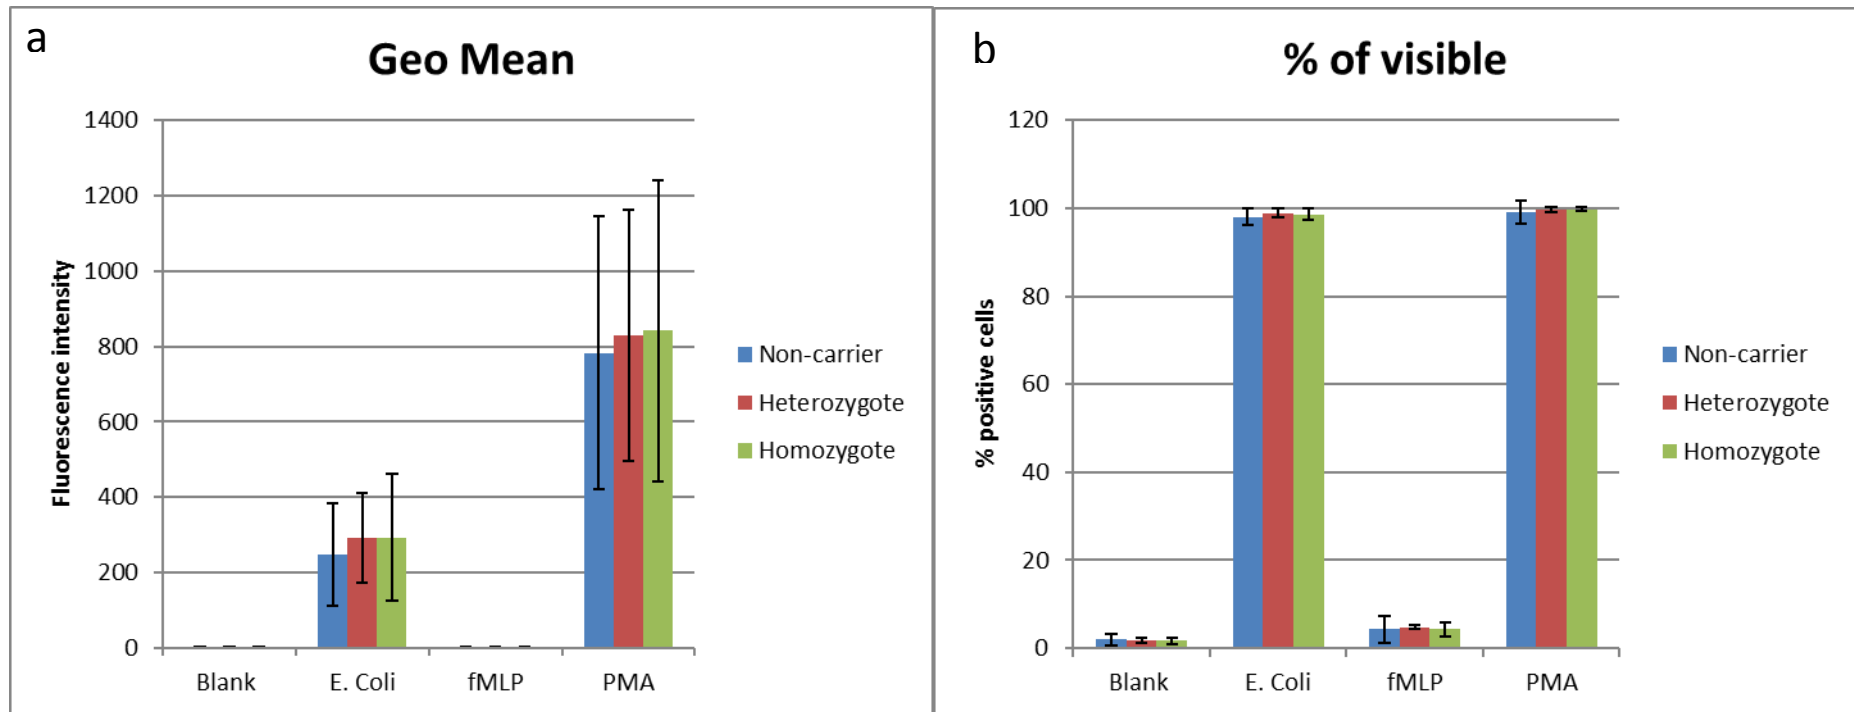

Reactive oxygen species (ROS) production test. Neutrophil respiratory burst after stimulation with: E. Coli, fMLP (Low control) and PMA (High control). Number of blood donors: n=14 non-carriers of the *ARHGAP15* sequence variant rs4662344, n=12 heterozygotes and n=14 homozygotes. A) The average geometric mean of fluorescent intensity for each group of rs4662344 carriers with standard deviation. B) Percentage of ROS positive cells, for each group of rs4662344 carriers, average with standard deviation.

Supplementary Figure 3. Effect of sequence variants on the expression of *COLQ* in white blood cells by RNA sequencing.

a) *COLQ* transcripts

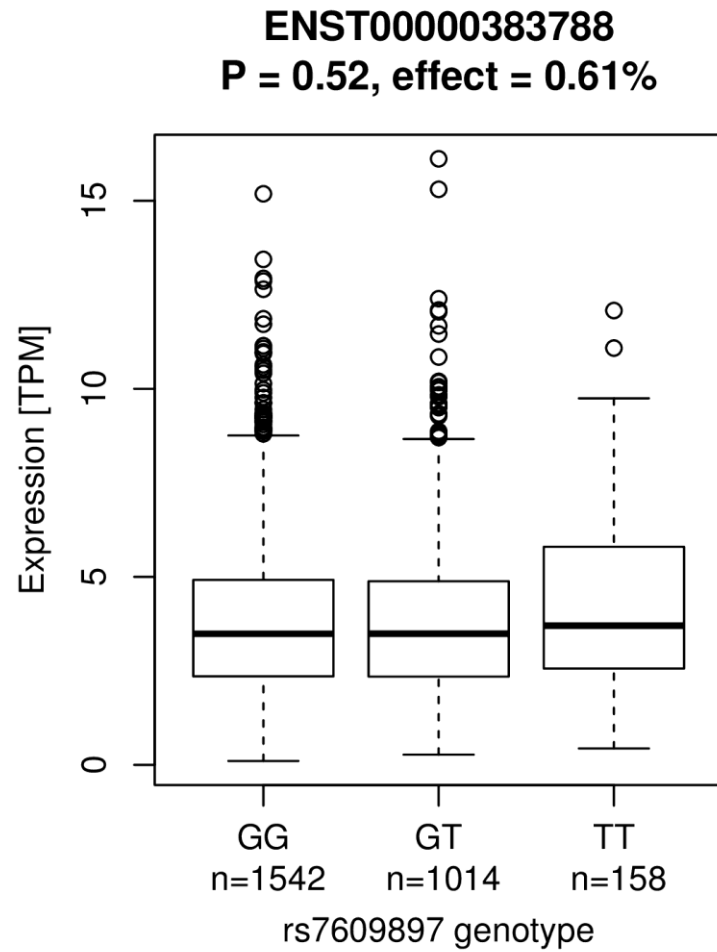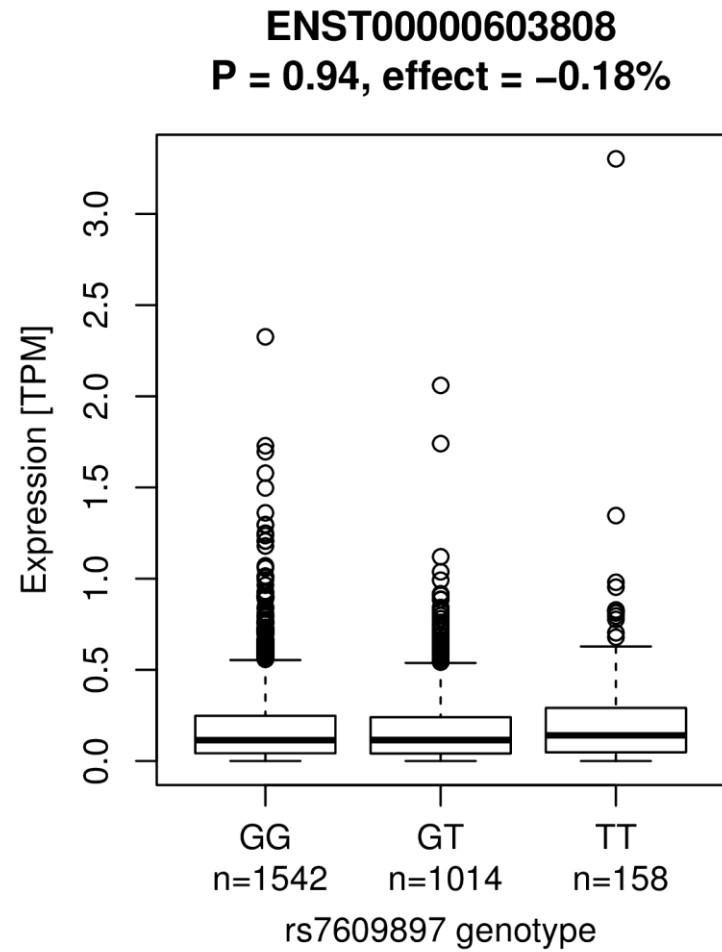

## b) COLQ exons

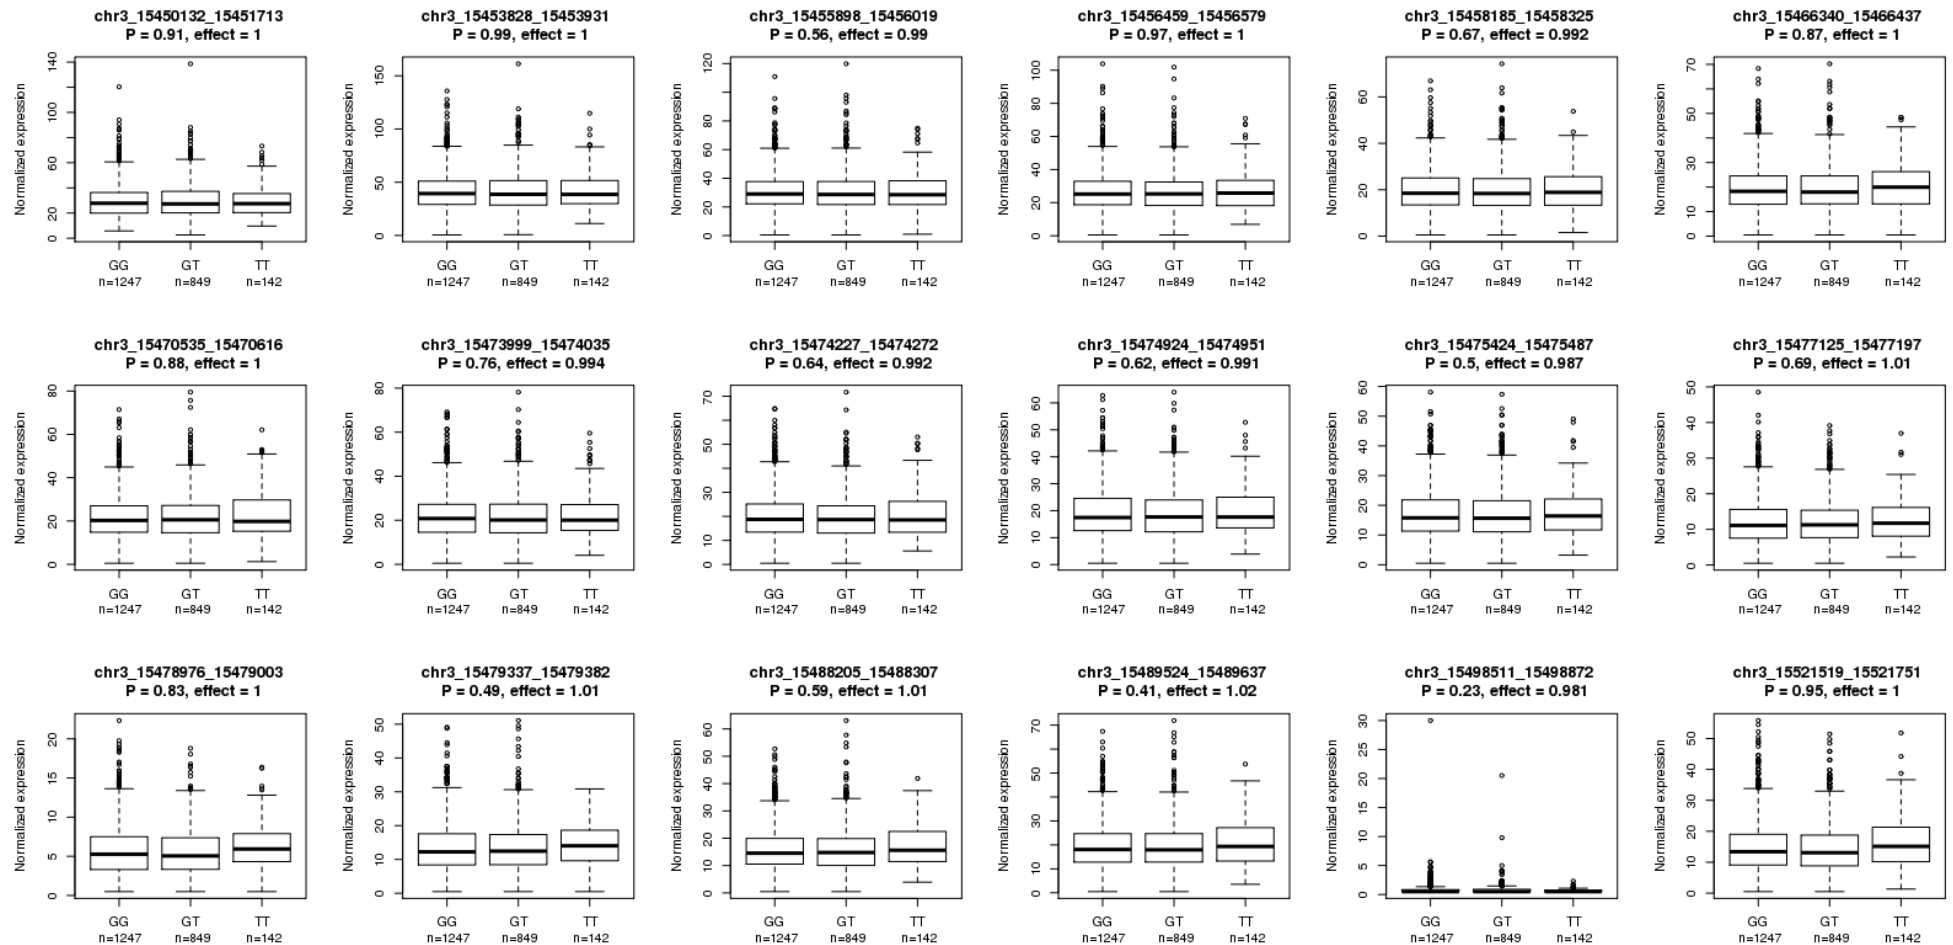

The RNAseq expression in whole blood for each transcript and exon is plotted for carriers of wild type, heterozygotes and homozygotes for the associated sequence variant. A line indicates the median, the box 25th and 75th percentiles of the distribution and the whiskers indicate the 95% confidence interval. A) Expression of two *COLQ* transcripts from 2,708 individuals plotted for the sequence variant rs7609897. B) *COLQ* expression, from 2,246 individuals, plotted for the sequence variant rs7609897.

Supplementary Figure 4. Effect of sequence variants on the expression of *FAM155A* in adipose cells by RNA sequencing.

a) *FAM155A* transcript

**ENST00000375915**  
**P = 0.13, effect = -2.3%**

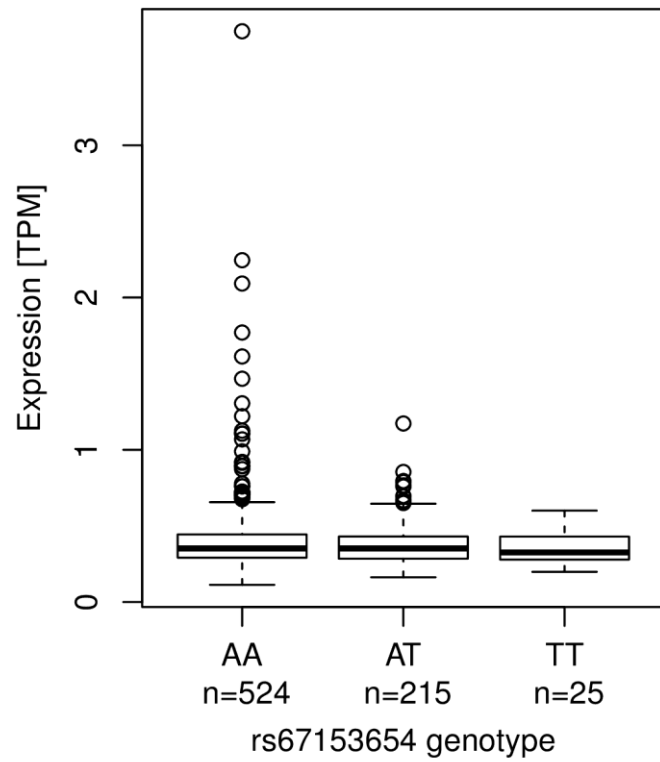

**b) *FAM155A* exons**

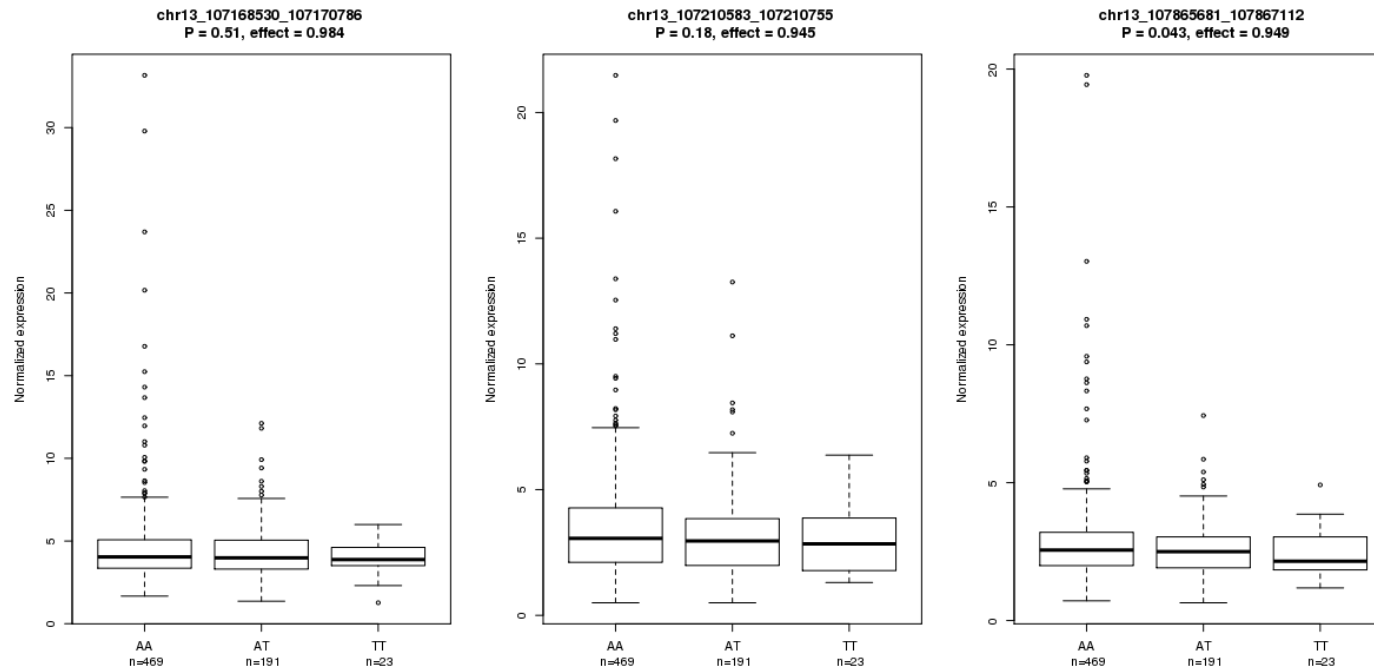

The RNAseq expression in adipose tissue (the gene has very low expression in blood) for each transcript and exon is plotted for carriers of wild type, heterozygotes and homozygotes for the associated sequence variant. A line indicates the median, the box 25th and 75th percentiles of the distribution and the whiskers indicate the 95% confidence interval. A) Expression of one *FAM155A* transcript from 764 individuals. B) *FAM155A* exons are plotted for the sequence variant rs67153654 from 708 individuals.

**Supplementary Table 1. The Icelandic diverticular disease cohort.**

| Covariate               | Diverticular disease           |             | Diverticulitis                 |             | Uncomplicated diverticular disease |             | Controls                       |             |
|-------------------------|--------------------------------|-------------|--------------------------------|-------------|------------------------------------|-------------|--------------------------------|-------------|
|                         | N (% samples with information) | Mean(SD)    | N (% samples with information) | Mean(SD)    | N (% samples with information)     | Mean(SD)    | N (% samples with information) | Mean(SD)    |
| <b>Sex, %females</b>    | 5,426 (100%)                   | 59.7%       | 2,764 (100%)                   | 57.6%       | 2,662 (100%)                       | 61.9%       | 245,951                        | 49.3%       |
| <b>BMI *</b>            | 2,891 (55%)                    | 27.8 (5.2)  | 1,486 (54%)                    | 28.2 (5.1)  | 1,464 (55%)                        | 27.2 (5.2)  | 75,939 (31%)                   | 26.3 (5.5)  |
| <b>Age at diagnosis</b> | 4,841 (91%)                    | 67.7 (14.7) | 2,764 (100%)                   | 62.9 (14.8) | 2,363 (90%)                        | 73.4 (12.1) | 245,951 (100%)                 | 55.4 (19.2) |
| <b>%Ever smokers</b>    | 2,648 (50%)                    | 82.0%       | 1,427 (52%)                    | 81.3%       | 1,266 (48%)                        | 83.0%       | 70,293 (28.5%)                 | 71.7%       |

N: Number and percentage of total samples with available information; Age at diagnosis, Body mass index (BMI) and smoking.

\*BMI max value was used if multiple measurements were available.



**Supplementary Table 2. Bonferroni *P*-value limits for each class of sequence variant.**

| <b>Variant impact</b>        | <b>Definition</b>                                 | <b>N</b>   | <b>Bonferroni limit</b> |
|------------------------------|---------------------------------------------------|------------|-------------------------|
| High                         | Stop-gain/loss, frameshift, splice donor/acceptor | 8,474      | $2.6 \times 10^{-7}$    |
| Medium                       | Missense, inframe indel, splice region            | 149,983    | $5.1 \times 10^{-8}$    |
| Low                          | 5'/3'UTR, upstream, downstream, synonymous        | 2,283,889  | $4.6 \times 10^{-9}$    |
| Other variants - within DHS  | Intron, intergenic                                | 3,913,058  | $2.3 \times 10^{-9}$    |
| Other variants - outside DHS | Intron, intergenic                                | 26,108,039 | $7.9 \times 10^{-10}$   |

N = number of sequence variants in each class. DHS = DNase hypersensitivity sites

**Supplementary Table 3a. Sequence variants validated in the Danish diverticular disease sample set.**

**Diverticular disease**

| SV ID       | Position        | P-value threshold       | Nearest gene    | SV function | Amin/Amaj  | Icelandic diverticular disease |                    |                        | Danish diverticular disease |                  |                      | Combined Icelandic and Danish diverticular disease sample sets |                       |                      |
|-------------|-----------------|-------------------------|-----------------|-------------|------------|--------------------------------|--------------------|------------------------|-----------------------------|------------------|----------------------|----------------------------------------------------------------|-----------------------|----------------------|
|             |                 |                         |                 |             |            | MAF %                          | OR (95% ci)        | P-value                | MAF %                       | OR (95% ci)      | P-value              | OR (95% ci)                                                    | P-value               | P het                |
| rs4662344   | chr2:143591289  | 2.3 x 10 <sup>-9</sup>  | <i>ARHGAP15</i> | intron      | T/C        | 20.9/17.7                      | 1.23 (1.16,1.31)   | 4.9x10 <sup>-13</sup>  | 21.7/18.5                   | 1.22 (1.13,1.32) | 7.0x10 <sup>-7</sup> | 1.23 (1.17,1.29)                                               | 1.9x10 <sup>-18</sup> | 0.86                 |
| rs7609897   | chr3:15461174   | 2.3 x 10 <sup>-9</sup>  | <i>COLQ</i>     | intron      | T/G        | 22.1/24.7                      | 0.85 (0.80,0.89)   | 1.6x10 <sup>-9</sup>   | 21.6/23.3                   | 0.91 (0.84,0.98) | 1.0x10 <sup>-2</sup> | 0.87 (0.83,0.91)                                               | 1.5x10 <sup>-10</sup> | 0.17                 |
| rs67153654  | chr13:107572636 | 2.3 x 10 <sup>-9</sup>  | <i>FAM155A</i>  | intron      | A/T        | 17.0/18.6                      | 0.89 (0.84,0.94)   | 8.7x10 <sup>-5</sup>   | 17.4/20.1                   | 0.84 (0.78,0.91) | 2.2x10 <sup>-5</sup> | 0.87 (0.83,0.91)                                               | 1.3x10 <sup>-8</sup>  | 0.30                 |
| rs61756577  | chr7:43492135   | 5.1 x 10 <sup>-8</sup>  | <i>HECW1</i>    | missense    | C/G        | 0.98/0.64                      | 1.74 (1.37,2.19)   | 3.9x10 <sup>-6</sup>   | 0.25/0.13                   | 1.84 (0.87,3.86) | 1.1x10 <sup>-1</sup> | 1.74 (1.40,2.18)                                               | 1.0x10 <sup>-6</sup>  | 0.89                 |
| rs9514637   | chr13:107249894 | 7.9 x 10 <sup>-10</sup> | <i>FAM155A</i>  | intron      | A/G        | 24.9/27.6                      | 0.89 (0.85,0.94)   | 1.6x10 <sup>-5</sup>   | 23.6/24.2                   | 0.97 (0.90,1.04) | 0.38                 | 0.92 (0.88,0.96)                                               | 5.6x10 <sup>-5</sup>  | 0.077                |
| rs2272901   | chr6:149218637  | 4.6 x 10 <sup>-9</sup>  | <i>TAB2</i>     | 5 prime UTR | A/G        | 25.8/28.0                      | 0.90 (0.85,0.95)   | 4.1x10 <sup>-5</sup>   | 26.6/27.7                   | 0.95 (0.88,1.02) | 0.13                 | 0.92 (0.88,0.95)                                               | 2.4x10 <sup>-5</sup>  | 0.24                 |
| rs761545809 | chr6:136194522  | 4.6 x 10 <sup>-9</sup>  | <i>PDE7B</i>    | 3 prime UTR | A/AAA<br>G | 0.44/0.22                      | 2.13 (1.45,3.12)   | 1.1x10 <sup>-4</sup>   | 0.08/0.1                    | 0.84 (0.19,3.77) | 0.82                 | 2.01 (1.39,2.91)                                               | 2.2x10 <sup>-4</sup>  | 0.24                 |
| rs1945615   | chr11:15081931  | 4.6 x 10 <sup>-9</sup>  | <i>CALCB</i>    | downstream  | A/G        | 32.7/30.2                      | 1.1 (1.05,1.15)    | 1.5x10 <sup>-4</sup>   | 31.0/30.1                   | 1.04 (0.97,1.11) | 0.24                 | 1.08 (1.04,1.12)                                               | 1.7x10 <sup>-4</sup>  | 0.21                 |
| rs17636410  | chr9:72401105   | 1.1 x 10 <sup>-9</sup>  | .               | intergenic  | A/G        | 27.3/25.1                      | 1.11 (1.06,1.17)   | 4.6x10 <sup>-5</sup>   | 25.2/24.8                   | 1.02 (0.95,1.10) | 0.60                 | 1.08 (1.04,1.13)                                               | 2.8x10 <sup>-4</sup>  | 0.055                |
| rs11263878  | chr1:36392266   | 4.6 x 10 <sup>-9</sup>  | <i>LSM10</i>    | downstream  | T/C        | 16.6/17.9                      | 0.93 (0.87,0.98)   | 0.011                  | 17.1/17.4                   | 0.98 (0.90,1.07) | 0.62                 | 0.94 (0.90,0.99)                                               | 0.018                 | 0.30                 |
| rs61741212  | chr19:35666838  | 5.1 x 10 <sup>-8</sup>  | <i>UPK1A</i>    | missense    | T/C        | 8.57/9.99                      | 0.81 (0.75,0.88)   | 3.7x10 <sup>-7</sup>   | 12.3/11.3                   | 1.11 (1.00,1.22) | 0.041                | 0.92 (0.87,0.98)                                               | 7.8x10 <sup>-3</sup>  | 1.7x10 <sup>-6</sup> |
| rs140894490 | chr7:44189408   | 4.6 x 10 <sup>-9</sup>  | <i>GCK</i>      | 5 prime UTR | C/T        | 0.68/0.39                      | 2.17 (1.63,2.88)   | 1.0x10 <sup>-7</sup>   | 0.18/0.25                   | 1.04 (0.96,1.13) | 0.33                 | 1.1 (1.02,1.18)                                                | 0.018                 | 1.1x10 <sup>-6</sup> |
| rs149367812 | chr1:186367896  | 5.1 x 10 <sup>-8</sup>  | <i>TPR</i>      | missense    | A/T        | 0.42/0.2                       | 1.84 (1.23,2.76)   | 3.1x10 <sup>-3</sup>   | 0.48/0.48                   | 1 (0.63,1.58)    | 0.99                 | 1.41 (1.04,1.91)                                               | 0.027                 | 0.049                |
| rs143318100 | chr1:154348533  | 5.1 x 10 <sup>-8</sup>  | <i>ATP8B2</i>   | missense    | A/G        | 0.19/0.27                      | 0.74 (0.46,1.19)   | 0.21                   | 0.01/0.02                   | 0.51 (0.03,8.29) | 0.63                 | 0.73 (0.46,1.17)                                               | 0.19                  | 0.79                 |
| rs773564372 | chr7:43558103   | 7.9 x 10 <sup>-10</sup> | <i>HECW1</i>    | intron      | T/C        | 0.71/0.38                      | 2.32 (1.75, 3.07)  | 4.9 x 10 <sup>-9</sup> | np                          | np               | np                   | np                                                             | np                    | np                   |
| rs760491413 | chr1:235999377  | 7.9 x 10 <sup>-10</sup> | <i>NID1</i>     | intron      | A/C        | 0.23/0.05                      | 5.48 (2.74, 10.97) | 1.6 x 10 <sup>-6</sup> | np                          | np               | np                   | np                                                             | np                    | np                   |

SV ID, Sequence variant identification. Position on the hg38. Amin, minor allele; Amaj, major allele; MAF, Minor allele frequency. MAF is calculated on the chip typed samples, excluding family imputed genotypes. OR, odds ratio of the minor allele; 95% CI, 95% confidence interval. np = not polymorphic, threshold for genome wide significance for an intronic-variant is P < 2.3x10<sup>-9</sup>. P het, P-value for the heterogeneity between cohorts.

**Supplementary Table 3b. Sequence variants validated in the Danish diverticular disease sample set.**

**Diverticulitis**

| SV ID       | Position        | P-value threshold       | Nearest gene | SV function | Amin/Amaj | Icelandic Diverticulitis     |                     |                        | Danish diverticular disease |                     |                      | Combined Icelandic diverticulitis and Danish diverticular disease sample sets |                       |                      |
|-------------|-----------------|-------------------------|--------------|-------------|-----------|------------------------------|---------------------|------------------------|-----------------------------|---------------------|----------------------|-------------------------------------------------------------------------------|-----------------------|----------------------|
|             |                 |                         |              |             |           | MAF %                        | OR (95% ci)         | P-value                | MAF %                       | OR (95% ci)         | P-value              | OR (95% ci)                                                                   | P-value               | P het                |
|             |                 |                         |              |             |           | 2,764 cases 245,951 controls |                     |                        | 5,970 cases, 3,020 controls |                     |                      | 8,734 cases 248,971 controls                                                  |                       |                      |
| rs4662344   | chr2:143591289  | 2.3 x 10 <sup>-9</sup>  | ARHGAP15     | intron      | T/C       | 21.3/17.7                    | 1.26<br>(1.16,1.36) | 4.5x10 <sup>-9</sup>   | 21.7/18.5                   | 1.22<br>(1.13,1.32) | 7.0x10 <sup>-7</sup> | 1.24<br>(1.17,1.31)                                                           | 1.8x10 <sup>-14</sup> | 0.62                 |
| rs7609897   | chr3:15461174   | 2.3 x 10 <sup>-9</sup>  | COLQ         | intron      | T/G       | 21.0/24.7                    | 0.80<br>(0.74,0.86) | 1.9x10 <sup>-9</sup>   | 21.6/23.3                   | 0.91<br>(0.84,0.98) | 1.0x10 <sup>-2</sup> | 0.85<br>(0.80,0.89)                                                           | 1.0x10 <sup>-9</sup>  | 0.02                 |
| rs67153654  | chr13:107572636 | 2.3 x 10 <sup>-9</sup>  | FAM155A      | intron      | A/T       | 15.6/18.6                    | 0.80<br>(0.74,0.87) | 2.3x10 <sup>-7</sup>   | 17.4/20.1                   | 0.84<br>(0.78,0.91) | 2.2x10 <sup>-5</sup> | 0.82<br>(0.78,0.87)                                                           | 3.0x10 <sup>-11</sup> | 0.43                 |
| rs61756577  | chr7:43492135   | 5.1 x 10 <sup>-8</sup>  | HECW1        | missense    | C/G       | 0.91/0.64                    | 1.73<br>(1.25,2.37) | 8.3x10 <sup>-4</sup>   | 0.25/0.13                   | 1.84<br>(0.87,3.86) | 0.11                 | 1.74<br>(1.30,2.34)                                                           | 2.1x10 <sup>-4</sup>  | 0.88                 |
| rs9514637   | chr13:107249894 | 7.9 x 10 <sup>-10</sup> | FAM155A      | intron      | A/G       | 24.4/27.6                    | 0.82<br>(0.76,0.88) | 5.0x10 <sup>-8</sup>   | 23.6/24.2                   | 0.97<br>(0.90,1.04) | 0.38                 | 0.89<br>(0.85,0.94)                                                           | 6.2x10 <sup>-6</sup>  | 1.5x10 <sup>-3</sup> |
| rs2272901   | chr6:149218637  | 4.6 x 10 <sup>-9</sup>  | TAB2         | 5 prime UTR | A/G       | 24.5/27.9                    | 0.84<br>(0.78,0.90) | 5.8x10 <sup>-7</sup>   | 26.6/27.7                   | 0.95<br>(0.88,1.02) | 0.13                 | 0.89<br>(0.85,0.94)                                                           | 3.8x10 <sup>-6</sup>  | 0.015                |
| rs761545809 | chr6:136194522  | 4.6 x 10 <sup>-9</sup>  | PDE7B        | 3 prime UTR | A/AAAG    | 0.58/0.22                    | 3.06<br>(1.94,4.81) | 1.3x10 <sup>-6</sup>   | 0.08/0.1                    | 0.84<br>(0.19,3.77) | 0.82                 | 2.74<br>(1.78,4.24)                                                           | 5.1x10 <sup>-6</sup>  | 0.11                 |
| rs1945615   | chr11:15081931  | 4.6 x 10 <sup>-9</sup>  | CALCB        | downstream  | A/G       | 34.3/30.2                    | 1.18<br>(1.11,1.26) | 4.3x10 <sup>-7</sup>   | 31.0/30.1                   | 1.04<br>(0.97,1.11) | 0.24                 | 1.11<br>(1.06,1.17)                                                           | 8.8x10 <sup>-6</sup>  | 7.5x10 <sup>-3</sup> |
| rs17636410  | chr9:72401105   | 1.1 x 10 <sup>-9</sup>  | .            | intergenic  | A/G       | 28.9/25.1                    | 1.19<br>(1.11,1.28) | 6.5x10 <sup>-7</sup>   | 25.2/24.8                   | 1.02<br>(0.95,1.10) | 0.60                 | 1.11<br>(1.05,1.16)                                                           | 7.3x10 <sup>-5</sup>  | 2.3x10 <sup>-3</sup> |
| rs11263878  | chr1:36392266   | 4.6 x 10 <sup>-9</sup>  | LSM10        | downstream  | T/C       | 14.7/17.9                    | 0.82<br>(0.75,0.89) | 2.1x10 <sup>-6</sup>   | 17.1/17.4                   | 0.98<br>(0.90,1.07) | 0.62                 | 0.89<br>(0.84,0.95)                                                           | 1.7x10 <sup>-4</sup>  | 3.3x10 <sup>-3</sup> |
| rs61741212  | chr19:35666838  | 5.1 x 10 <sup>-8</sup>  | UPK1A        | missense    | T/C       | 8.05/9.99                    | 0.79<br>(0.71,0.88) | 1.6x10 <sup>-5</sup>   | 12.3/11.3                   | 1.11<br>(1.00,1.22) | 0.04                 | 0.95<br>(0.88,1.02)                                                           | 0.17                  | 4.8x10 <sup>-6</sup> |
| rs140894490 | chr7:44189408   | 4.6 x 10 <sup>-9</sup>  | GCK          | 5 prime UTR | C/T       | 0.59/0.39                    | 2.01<br>(1.35,2.98) | 5.2x10 <sup>-4</sup>   | 0.18/0.25                   | 1.04<br>(0.96,1.13) | 0.33                 | 1.07<br>(0.99,1.15)                                                           | 0.10                  | 1.3x10 <sup>-3</sup> |
| rs149367812 | chr1:186367896  | 5.1 x 10 <sup>-8</sup>  | TPR          | missense    | A/T       | 0.54/0.2                     | 2.44<br>(1.48,4.01) | 4.3x10 <sup>-4</sup>   | 0.48/0.48                   | 1<br>(0.63,1.58)    | 0.99                 | 1.51<br>(1.07,2.11)                                                           | 0.017                 | 9.5x10 <sup>-3</sup> |
| rs143318100 | chr1:154348533  | 5.1 x 10 <sup>-8</sup>  | ATP8B2       | missense    | A/G       | 0.0/0.27                     | 0.16<br>(0.05,0.44) | 4.9x10 <sup>-4</sup>   | 0.01/0.02                   | 0.51<br>(0.03,8.29) | 0.63                 | 0.18<br>(0.07,0.48)                                                           | 5.9x10 <sup>-4</sup>  | 0.44                 |
| rs773564372 | chr7:43558103   | 7.9 x 10 <sup>-10</sup> | HECW1        | intron      | T/C       | 0.60/0.38                    | 2.06<br>(1.39,3.06) | 3.5 x 10 <sup>-4</sup> | np                          | np                  | np                   | np                                                                            | np                    | Np                   |
| rs760491413 | chr1:235999377  | 7.9 x 10 <sup>-10</sup> | NID1         | intron      | A/C       | 0.29/0.05                    | 6.99<br>(3.11,15.7) | 2.6 x 10 <sup>-6</sup> | np                          | np                  | np                   | np                                                                            | np                    | Np                   |

SV ID, Sequence variant identification. Position on the hg38. Amin, minor allele; Amaj, major allele; MAF, Minor allele frequency. MAF is calculated on the chip typed samples only, excluding family imputed genotypes. OR, odds ratio of the minor allele; 95% CI, 95% confidence interval. np = not polymorphic, threshold for genome wide significance for an intronic-variant is P< 2.3x10<sup>-9</sup>. P het, P-value for the heterogeneity between cohorts.

Supplementary Table 3c. Sequence variants validated in the Danish diverticular disease sample set.

Uncomplicated diverticular disease

| SV ID       | Position        | P-value threshold       | Nearest gene | SV function | Amin/Amaj | Icelandic uncomplicated diverticular disease |                     |                        | Danish diverticular disease |                     |                      | Combined Icelandic uncomplicated diverticular disease and Danish diverticular disease sample sets |                       |                      |
|-------------|-----------------|-------------------------|--------------|-------------|-----------|----------------------------------------------|---------------------|------------------------|-----------------------------|---------------------|----------------------|---------------------------------------------------------------------------------------------------|-----------------------|----------------------|
|             |                 |                         |              |             |           | 2,662 cases, 245,951 controls                |                     |                        | 5,970 cases, 3,020 controls |                     |                      | 8,632 cases 248,971 controls                                                                      |                       |                      |
|             |                 |                         |              |             |           | MAF %                                        | OR (95% ci)         | P-value                | MAF %                       | OR (95% ci)         | P-value              | OR (95% ci)                                                                                       | P-value               | P het                |
| rs4662344   | chr2:143591289  | 2.3 x 10 <sup>-9</sup>  | ARHGAP15     | intron      | T/C       | 20.4/17.7                                    | 1.2<br>(1.11,1.30)  | 2.6x10 <sup>-6</sup>   | 21.7/18.5                   | 1.22<br>(1.13,1.32) | 7.0x10 <sup>-7</sup> | 1.21<br>(1.15,1.28)                                                                               | 8.6x10 <sup>-12</sup> | 0.77                 |
| rs7609897   | chr3:15461174   | 2.3 x 10 <sup>-9</sup>  | COLQ         | intron      | T/G       | 23.7/24.7                                    | 0.91<br>(0.84,0.97) | 6.1x10 <sup>-3</sup>   | 21.6/23.3                   | 0.91<br>(0.84,0.98) | 0.01                 | 0.91<br>(0.86,0.95)                                                                               | 1.7x10 <sup>-4</sup>  | 1                    |
| rs67153654  | chr13:107572636 | 2.3 x 10 <sup>-9</sup>  | FAM155A      | intron      | A/T       | 18.87/18.6                                   | 0.99<br>(0.91,1.06) | 0.72                   | 17.4/20.1                   | 0.84<br>(0.78,0.91) | 2.2x10 <sup>-5</sup> | 0.91<br>(0.87,0.97)                                                                               | 1.4x10 <sup>-3</sup>  | 4.9x10 <sup>-3</sup> |
| rs61756577  | chr7:43492135   | 5.1 x 10 <sup>-8</sup>  | HECW1        | missense    | C/G       | 1.01/0.64                                    | 1.74<br>(1.27,2.38) | 5.2x10 <sup>-4</sup>   | 0.25/0.13                   | 1.84<br>(0.87,3.86) | 0.11                 | 1.75<br>(1.31,2.34)                                                                               | 1.3x10 <sup>-4</sup>  | 0.89                 |
| rs9514637   | chr13:107249894 | 7.9 x 10 <sup>-10</sup> | FAM155A      | intron      | A/G       | 25.8/27.6                                    | 0.98<br>(0.91,1.05) | 0.49                   | 23.6/24.2                   | 0.97<br>(0.90,1.04) | 0.38                 | 0.97<br>(0.92,1.02)                                                                               | 0.27                  | 0.87                 |
| rs2272901   | chr6:149218637  | 4.6 x 10 <sup>-9</sup>  | TAB2         | 5 prime UTR | A/G       | 27.6/27.95                                   | 0.97<br>(0.91,1.04) | 0.40                   | 26.6/27.7                   | 0.95<br>(0.88,1.02) | 0.13                 | 0.96<br>(0.91,1.01)                                                                               | 0.094                 | 0.61                 |
| rs761545809 | chr6:136194522  | 4.6 x 10 <sup>-9</sup>  | PDE7B        | 3 prime UTR | A/AAAG    | 0.27/0.22                                    | 1.15<br>(0.61,2.15) | 0.67                   | 0.08/0.1                    | 0.84<br>(0.19,3.77) | 0.82                 | 1.1<br>(0.61,1.96)                                                                                | 0.76                  | 0.71                 |
| rs1945615   | chr11:15081931  | 4.6 x 10 <sup>-9</sup>  | CALCB        | downstream  | A/G       | 30.8/30.2                                    | 1.01<br>(0.94,1.08) | 0.79                   | 31.0/30.1                   | 1.04<br>(0.97,1.11) | 0.24                 | 1.02<br>(0.98,1.07)                                                                               | 0.31                  | 0.52                 |
| rs17636410  | chr9:72401105   | 1.1 x 10 <sup>-9</sup>  | .            | intergenic  | A/G       | 25.3/25.1                                    | 1.03<br>(0.96,1.10) | 0.43                   | 25.2/24.8                   | 1.02<br>(0.95,1.10) | 0.60                 | 1.02<br>(0.97,1.08)                                                                               | 0.35                  | 0.87                 |
| rs11263878  | chr1:36392266   | 4.6 x 10 <sup>-9</sup>  | LSM10        | downstream  | T/C       | 19/17.9                                      | 1.05<br>(0.97,1.14) | 0.21                   | 17.1/17.4                   | 0.98<br>(0.90,1.07) | 0.62                 | 1.02<br>(0.96,1.08)                                                                               | 0.55                  | 0.22                 |
| rs61741212  | chr19:35666838  | 5.1 x 10 <sup>-8</sup>  | UPK1A        | missense    | T/C       | 9.25/9.99                                    | 0.85<br>(0.76,0.94) | 2.1x10 <sup>-3</sup>   | 12.3/11.3                   | 1.11<br>(1.00,1.22) | 0.041                | 0.98<br>(0.91,1.05)                                                                               | 0.55                  | 2.6x10 <sup>-4</sup> |
| rs140894490 | chr7:44189408   | 4.6 x 10 <sup>-9</sup>  | GCK          | 5 prime UTR | C/T       | 0.75/0.39                                    | 2.34<br>(1.61,3.41) | 9.5x10 <sup>-6</sup>   | 0.18/0.25                   | 1.04<br>(0.96,1.13) | 3.3x10 <sup>-1</sup> | 1.08<br>(1.00,1.16)                                                                               | 0.062                 | 3.6x10 <sup>-5</sup> |
| rs149367812 | chr1:186367896  | 5.1 x 10 <sup>-8</sup>  | TPR          | missense    | A/T       | 0.27/0.2                                     | 1.17<br>(0.63,2.19) | 0.62                   | 0.48/0.48                   | 1<br>(0.63,1.58)    | 0.99                 | 1.05<br>(0.73,1.53)                                                                               | 0.78                  | 0.68                 |
| rs143318100 | chr1:154348533  | 5.1 x 10 <sup>-8</sup>  | ATP8B2       | missense    | A/G       | 0.41/0.27                                    | 1.36<br>(0.81,2.31) | 0.25                   | 0.01/0.02                   | 0.51<br>(0.03,8.29) | 0.63                 | 1.32<br>(0.79,2.21)                                                                               | 0.29                  | 0.49                 |
| rs773564372 | chr7:43558103   | 7.9 x 10 <sup>-10</sup> | HECW1        | intron      | T/C       | 0.81/0.38                                    | 2.4<br>(1.66,3.47)  | 3.0 x 10 <sup>-6</sup> | np                          | np                  | np                   | np                                                                                                | np                    | np                   |
| rs760491413 | chr1:235999377  | 7.9 x 10 <sup>-10</sup> | NID1         | intron      | A/C       | 0.14/0.05                                    | 2.7<br>(0.87,8.39)  | 0.086                  | np                          | np                  | np                   | np                                                                                                | np                    | np                   |

SV ID, Sequence variant identification. Position on the hg38. Amin, minor allele; Amaj, major allele; MAF, Minor allele frequency. MAF is calculated on the chip typed samples only, excluding family imputed genotypes. OR, odds ratio of the minor allele; 95% CI, 95% confidence interval. np = not polymorphic, threshold for genome wide significance for an intronic-variant is P < 2.3x10<sup>-9</sup>. P het, P-value for the heterogeneity between cohorts.

**Supplementary Table 4. Diverticulitis vs uncomplicated diverticular disease.**

| <b>Gene</b> | <b>SV ID</b> | <b>OR (95% CI)</b> | <b>P-value</b>       |
|-------------|--------------|--------------------|----------------------|
| ARHGAP15    | rs4662344    | 1.01 (0.90,1.13)   | 0.90                 |
| COLQ        | rs7609897    | 0.93 (0.83,1.03)   | 0.17                 |
| FAM155A     | rs67153654   | 0.84 (0.74,0.94)   | $3.8 \times 10^{-3}$ |

SV ID, Sequence variant identification. OR, odds ratio of the minor allele; 95% CI, 95% confidence interval. Diverticulitis N=2,748 Diverticular disease, without known diverticulitis N= 2,662

**Supplementary Table 5. Genes and missense/LOF variants within each locus (+/- 100kb of lead sequence variant).**

**ARHGAP15**

| Genes           | # LOF | P-value* | # missense | P-value* | Gene name                        | GTEX tissue expression, top 5                                                                   | UniProtKB short description                                                                                                                                                                              |
|-----------------|-------|----------|------------|----------|----------------------------------|-------------------------------------------------------------------------------------------------|----------------------------------------------------------------------------------------------------------------------------------------------------------------------------------------------------------|
| <i>ARHGAP15</i> | 0     | -        | 9          | 0.507    | Rho GTPase activating protein 15 | Whole Blood, EBV transformed lymphocytes, Spleen, Nerve-Tibial, Small Intestine -Terminal Ileum | GTPase activator for the Rho-type GTPases by converting them to an inactive GDP-bound state. Has activity toward RAC1. Overexpression results in an increase in actin stress fibers and cell contraction |

**COLQ**

| Genes         | # LOF | P-value* | # missense | P-value*             | Gene name                                                                                   | GTEX tissue expression, top 5                                                                              | UniProtKB short description                                                                                                              |
|---------------|-------|----------|------------|----------------------|---------------------------------------------------------------------------------------------|------------------------------------------------------------------------------------------------------------|------------------------------------------------------------------------------------------------------------------------------------------|
| <i>COLQ</i>   | 0     | -        | 12         | 2.3x10 <sup>-4</sup> | Collagen-like tail subunit (single strand of homotrimer) of asymmetric acetylcholinesterase | Brain-cerebellar Hemisphere, Brain-cerebellum, Testis, Spleen, Heart-Atrial appendage                      | Anchors the catalytic subunits of asymmetric AChE to the synaptic basal lamina                                                           |
| <i>HACL1</i>  | 2     | 0.6789   | 11         | 0.042                | 2-hydroxyacyl-CoA lyase 1                                                                   | Testis, EBV transformed lymphocytes, Adipose, Thyroid, Breast mammary tissue                               | Catalyzes a carbon-carbon cleavage reaction; cleaves a 2-hydroxy-3-methylacyl-CoA into formyl-CoA and a 2-methyl-branched fatty aldehyde |
| <i>EAF1</i>   | 0     | -        | 6          | 0.32                 | ELL associated factor 1                                                                     | EBV transformed lymphocytes, Testis, Brain-cerebellar Hemisphere, Pituitary, Brain-Frontal Cortex          | Acts as a transcriptional transactivator of ELL and ELL2 elongation activities                                                           |
| <i>METTL6</i> | 1     | 0.07142  | 4          | 0.071                | Methyltransferase like 6                                                                    | Testis, Brain-Cerebellar Hemisphere, Brain-Cerebellum, Brain-Frontal Cortex, Cells transformed fibroblasts | Probable methyltransferase                                                                                                               |

**FAM155A**

| Genes          | # LOF | P-value* | # missense | P-value* | Gene name                                     | GTEX tissue expression, top 5                                                                      | UniProtKB short description |
|----------------|-------|----------|------------|----------|-----------------------------------------------|----------------------------------------------------------------------------------------------------|-----------------------------|
| <i>FAM155A</i> | 0     | -        | 16         | 0.094    | Family with sequence similarity 155, member A | Pituitary, Brain-Frontal Cortex, Brain-Hypothalamus, Brain-Anterior cingulate cortex, Brain-Cortex | na                          |

\* P-value for the association for the strongest variant. For each locus (+/- 100 kb of lead association variant) all protein coding genes are listed with the number of loss of function (LOF) and missense/splice sequence variants in each gene. The best P-value for association with diverticular disease from a coding variant in each gene is given. The five tissues with the highest expression according to GTEx are listed, and a short description of each gene according to UniProtKB database.

**Supplementary Table 6. IBD Polygenic Risk Score analysis.**

|                                                            | <b>P &lt; 5x10<sup>-8</sup></b> |                          | <b>P &lt; 0.05</b>      |                          |
|------------------------------------------------------------|---------------------------------|--------------------------|-------------------------|--------------------------|
| <b>Polygenic risk score for inflammatory bowel disease</b> |                                 |                          |                         |                          |
|                                                            | <b>P-value</b>                  | <b>R<sup>2</sup> (%)</b> | <b>P-value</b>          | <b>R<sup>2</sup> (%)</b> |
| Crohns disease                                             | 4.11x10 <sup>-22</sup>          | 2.5                      | 2.15x10 <sup>-29</sup>  | 3.4                      |
| Diverticular disease                                       | 0.27                            | 0.002                    | 0.083                   | 0.0063                   |
| Diverticulitis                                             | 0.35                            | 0.0045                   | 0.3                     | 0.0047                   |
| Inflammatory Bowel Disease                                 | 1.26x10 <sup>-86</sup>          | 2.9                      | 7.39x10 <sup>-104</sup> | 3.5                      |
| Ulcerative Colitis                                         | 1.17x10 <sup>-63</sup>          | 2.6                      | 9.98x10 <sup>-76</sup>  | 3.1                      |
| <b>Polygenic risk score for Crohn's Disease</b>            |                                 |                          |                         |                          |
|                                                            | <b>P-value</b>                  | <b>R<sup>2</sup> (%)</b> | <b>P-value</b>          | <b>R<sup>2</sup> (%)</b> |
| Crohns disease                                             | 9x10 <sup>-27</sup>             | 3.1                      | 3.51x10 <sup>-30</sup>  | 3.5                      |
| Diverticular disease                                       | 0.16                            | 0.0039                   | 0.34                    | 0.00084                  |
| Diverticulitis                                             | 0.54                            | 0.0014                   | 0.45                    | 0.0017                   |
| Inflammatory Bowel Disease                                 | 1.66x10 <sup>-56</sup>          | 1.9                      | 2.2x10 <sup>-68</sup>   | 2.2                      |
| Ulcerative Colitis                                         | 1.88x10 <sup>-34</sup>          | 1.4                      | 2.44x10 <sup>-43</sup>  | 1.7                      |
| <b>Polygenic risk score for Ulcerative colitis</b>         |                                 |                          |                         |                          |
|                                                            | <b>P-value</b>                  | <b>R<sup>2</sup> (%)</b> | <b>P-value</b>          | <b>R<sup>2</sup> (%)</b> |
| Crohns disease                                             | 2.09E <sup>-08</sup>            | 0.87                     | 1.70E <sup>-16</sup>    | 1.8                      |
| Diverticular disease                                       | 0.34                            | 0.0014                   | 0.092                   | 0.0097                   |
| Diverticulitis                                             | 0.53                            | 0.0024                   | 0.24                    | 0.0093                   |
| Inflammatory Bowel Disease                                 | 1.98x10 <sup>-83</sup>          | 2.8                      | 8.23x10 <sup>-101</sup> | 3.4                      |
| Ulcerative Colitis                                         | 9.96x10 <sup>-76</sup>          | 3.1                      | 1.41x10 <sup>-84</sup>  | 3.5                      |

Polygenic risk scores (PRS) were calculated using publicly available summary statistics of IBD/UC/CD in Europeans from an ImmunoChip GWAS study on IBD<sup>2</sup>. Polygenic risk scores were then tested for association with diverticular disease and diverticulitis using generalized additive regression with smoothed age, sex and the first five principal components as covariates using *P*-value threshold of  $P < 5 \times 10^{-8}$  and  $P < 0.05$ . *R*<sup>2</sup> (%): Variance explained was estimated using Nagelkerke's pseudo R-squared.

**Supplementary Table 7. Sequence variants previously reported to associate to diverticular disease or related diseases.**

| <b>Gene</b>    | <b>SNP</b> | <b>P-value</b> | <b>OR (95%CI)</b> |
|----------------|------------|----------------|-------------------|
| <i>RPRM</i>    | rs1063728  | 0.98           | 1.00 (0.92,1.09)  |
| <i>TNFSF15</i> | rs7848647  | 0.49           | 1.02 (0.97,1.07)  |
| <i>COL3A1</i>  | rs1800255  | 0.74           | 1.01 (0.96,1.06)  |

P-value and odds ratio (OR) with 95% CI, 95% confidence interval for the association with diverticular disease in Iceland.



**Supplementary Table 8. Haploreg analysis of SNPs in LD ( $r^2 > 0.6$ ) with the lead associated sequence variants.**

| Genes           | variant    | Ref | Alt | SiPhy<br>cons | Promoter<br>histone marks        | Enhancer<br>histone marks                       | DNase                     | Motifs<br>changed                   |
|-----------------|------------|-----|-----|---------------|----------------------------------|-------------------------------------------------|---------------------------|-------------------------------------|
| <b>ARHGAP15</b> | rs61603193 | AT  | A   | yes           | FAT, STRM,<br>VAS, SKIN,<br>BONE | BLOOD, STRM, MUS, SKIN,<br>FAT, GI, LUNG, BRAIN | ESDR,LUNG,GI,<br>MUS,SKIN | Cdx,Foxa,Foxp1,Hoxa9,<br>Sox,Zfp105 |
| <b>COLQ</b>     | rs7609897  | G   | T   | no            |                                  | BLOOD, HEART, THYM,<br>PANC                     |                           | BATF,Nrf1                           |
| <b>FAM155A</b>  | rs67153654 | T   | A   | no            | BRAIN                            | ESDR<br>BRAIN                                   | Nanog,Sox,Zfp105          |                                     |

Results from Haploreg 4.1 August 2016. URL:<http://www.broadinstitute.org/mammals/haploreg/haploreg.php>

## Supplementary note.

We did not find any effect of rs4662344-T (or other variants associating with diverticular disease) at the *ARHGAP15* locus on expression in blood or adipocytes. We looked for potential effects of these variants on transcription factor and enhancer regions. H3K27 acetylation, DNase I sensitivity and the SiPhy conservation score indicate that the indel rs61603193 (AT/A,  $r^2=0.97$  with rs4662344-T) could be in an enhancer region (Haploreg 4.1)<sup>3</sup> (Supplementary Table 5). Acetylation marks are observed in multiple tissues including colon smooth muscle, sigmoid colon and colonic mucosa and rs61603193 alters six potential transcription factor (TF) binding sites, with the largest effect on Cdx, the caudal-related homeodomain TFs. Cdx1 and Cdx2 are expressed in colon and Cdx2 is required for intestinal development and colon specification in mice<sup>4,5</sup>.

rs7609897-T in *COLQ* is in an intron with potential histone marks in four tissues, including primary T-cells and could introduce regulatory motifs for BATF\_disc3 and Nrf1\_known2 (Haploreg 4.1)<sup>3</sup>.

At the *FAM155A* (Family With Sequence Similarity 155A) locus there are fourteen variants in LD ( $r^2>0.6$ ) with rs67153654-A, which has the potential to disrupt regulatory motifs for Sox\_13, Sox\_10 and Nanog\_disc2 and has histone modification signals in brain and neuronal cells (Haploreg 4.1)<sup>3</sup>.

The best coding signal identified in this study is represented by a rare missense variant rs61756577-C (p.Val1065Leu, MAF 0.65%) in *HECW1* (OR=1.74,  $P=3.9\times 10^{-6}$ ) and a similar effect in the Danish sample (OR=1.84,  $P=0.11$ ,  $P_{\text{het}}=0.90$ ), but association in Icelandic and Danish samples combined (OR=1.74,  $P=1.0\times 10^{-6}$ ) did not reach genome-wide significance (Supplementary Table 3a). The *HECW1* gene also harbors 8 rare intronic variants, marked by rs77356437 (MAF 0.40%) showing suggestive association with diverticular disease (OR=2.32,  $P=4.9\times 10^{-9}$ ). rs77356437 correlated with the *HECW1* missense variant rs61756577-C ( $r^2=0.68$ ). However, rs77356437 is not present in the Danish samples and thus the association could not be validated (Supplementary Table 2a).

## Supplementary methods.

### Effect of smoking.

We used questionnaire data to assess whether smoking affects the risk of DD in Iceland<sup>6,7</sup>. Heavy smokers defined to have 10 pack years or more (N=26,113, >10 pack-years; 1 packyear defined as 1 pack of cigarettes per day for 1 year)

were compared to those who answered that they had never smoked (N=22,815). The risk of being diagnosed with DD was calculated for each group and adjusted for sex and age. The effect of smoking on the risk of the sequence variants rs4662344-T in ARHGAP15, rs7609897-T in COLQ and rs67153654-A in FAM155A was also calculated.

### **Effect of inflammatory biomarkers.**

The Data on inflammatory biomarkers were obtained from three of the largest laboratories in Iceland (measurements performed between the years 1993 and 2015): the laboratory of the Landspítali University Hospital, the Icelandic Medical Center (Laeknasetrid) Laboratory in Mjódd (RAM) and Akureyri Hospital (FSA). The following data were used: C reactive protein (CRP) levels (N=202,790), white blood cell count (N=273,110), neutrophil count (N=252,010), and erythrocyte sedimentation rate (N=176,966). All blood measurements were standardized using quantile-quantile standardization and then corrected for year of birth (or age), sex and age at measurement<sup>8</sup>.

### **Sample preparation and DNA whole-genome sequencing methods.**

Our dataset contains samples obtained using three different library preparation methods from Illumina. In addition sequencing was performed using three different types of Illumina sequencing instruments

- a) Standard TruSeq DNA library preparation method. Illumina GAIIx and/or HiSeq 2000 sequencers.
- b) TruSeq DNA PCR-free library preparation method. Illumina HiSeq 2500 sequencers.
- c) TruSeq Nano DNA library preparation method. Illumina HiSeq X sequencers.

A more detailed description of each sample preparation method is provided below.

### **Sample preparation and sequencing using the standard TruSeq DNA library preparation method.**

Approximately 1 µg of genomic DNA, isolated from frozen blood samples, was fragmented to a mean target size of approximately 300-400 bp using a Covaris E210 instrument. The resulting fragmented DNA was end repaired using T4 and Klenow polymerases and T4 polynucleotide kinase with 10 mM dNTP followed by addition of an 'A' base at the ends using Klenow exo fragment (3' to 5'-exo minus) and dATP (1 mM). Sequencing adaptors containing 'T' overhangs were ligated to the DNA products followed by agarose (2%) gel electrophoresis. Fragments of about 450-500 bp were isolated from the gels (QIAGEN Gel Extraction Kit), and the adaptor-modified DNA fragments were PCR enriched for ten cycles using Phusion DNA polymerase (Finnzymes Oy) and a PCR primer cocktail needed for paired-end sequencing. Enriched libraries were purified using AMPure XP beads. The quality and concentration of the

libraries were assessed with the Agilent 2100 Bioanalyzer using the DNA 1000 LabChip. Libraries were stored at  $-20^{\circ}\text{C}$ . Sequencing-by-synthesis (SBS) was performed on either Illumina GAIIx or HiSeq 2000 instruments, respectively. Paired-end libraries were sequenced using 2x76, 2x101 or 2x120 cycles of incorporation and imaging with Illumina SBS kits, TruSeq™ v5 for the GAIIx. For the HiSeq 2000, 2x101 cycles with SBS kits v2.5 or v3 were employed. Each library was initially run on a single lane on a GAIIx for validation, assessing optimal cluster densities, insert size, duplication rates and comparison to chip genotyping data. Following validation, the desired sequencing depth (10X to 30X) was then obtained using either sequencing platform. Targeted raw cluster densities ranged from 500–800 K/mm<sup>2</sup>, depending on the version of both the sequencing chemistry and the data imaging/analysis software packages (SCS.2.8/RTA1.8 or SCS2.9/RTA1.9 for the GAIIx and HCS1.3.8. or HCS1.4.8 for HiSeq 2000). Real-time analysis involved conversion of image data to base-calling in real-time.

#### **Sample preparation and sequencing using the TruSeq DNA PCR-free method.**

Paired-end libraries for sequencing were prepared according to the manufacturer's instructions (Illumina, TruSeq DNA PCR-free™). In short, approximately 1  $\mu\text{g}$  of genomic DNA, isolated from frozen blood samples, was fragmented to Nature Genetics: doi:10.1038/ng.3816 9 a mean target size of 350 bp using a Covaris E210 ultrasonicator followed by clean-up using AmPure XP purification beads. Blunt-end DNA from the resulting fragments was generated using a mix of 3'>5' exonuclease and 5'>3' polymerase activities, respectively, followed by 5'-phosphorylation using T4 polynucleotide kinase. Size-selection of the blunt-end fragments was done using a two-step purification strategy with different ratios of the AmPure XP purification beads (0.6X and 1X). Finally, 3'-adenylation and ligation of barcoded adapters was performed, followed by clean-up with magnetic beads. The quality and concentration of the libraries were assessed with the Agilent 2100 Bioanalyzer using the DNA 1000 LabChip (Agilent). Barcoded libraries were stored at  $-20^{\circ}\text{C}$ . All steps in the workflow were monitored using an in-house laboratory information management system with barcode tracking of all samples and reagents. All samples were first pooled (12-24 plex) and sequenced on Illumina's MiSeq instruments (2x25 cycles) to assess quality and effective concentration of sequencing libraries. Subsequent deep sequencing was done on HiSeq 2500 instruments, where each sample was sequenced on 3 lanes, generating >100 Gb of raw data and at least 30X coverage. Sequencing was done using TruSeq v3 reagents, paired-end 2x100 cycles. System operation and base calling in real-time was done using HCS 2.2.38 and RTA 1.18.61.

### **Sample preparation and sequencing using the TruSeq Nano DNA method.**

The sample preparation workflow was essentially the same as described above for the TruSeq DNA PCR-free method, except the input amount was 100 ng of genomic DNA (instead of 1 µg) and following clean-up of adapter ligated DNA, the samples were enriched by 8-cycles of PCR using a PCR primer cocktail, followed by Ampure XP bead clean-up. The quality and concentration of the libraries were assessed with the Perkin Elmer LabChip GX instrument using the HT DNA HiSens reagent kit. Sequencing was done using the HiSeq X HD reagent kit. Each sample was loaded onto the HiSeq X instrument at a concentration of 300 pM and sequenced to high depth (>30X). System operation and base calling in real-time was done using HCSX 3.1.26 and RTA2 2.3.9.

## References.

1. Sveinbjornsson G, *et al.* Weighting sequence variants based on their annotation increases power of whole-genome association studies. *Nature genetics* **48**, 314-317 (2016).
2. Liu JZ, *et al.* Association analyses identify 38 susceptibility loci for inflammatory bowel disease and highlight shared genetic risk across populations. *Nature genetics* **47**, 979-986 (2015).
3. Ward LD, Kellis M. HaploReg v4: systematic mining of putative causal variants, cell types, regulators and target genes for human complex traits and disease. *Nucleic acids research* **44**, D877-881 (2016).
4. Grainger S, Savory JG, Lohnes D. Cdx2 regulates patterning of the intestinal epithelium. *Dev Biol* **339**, 155-165 (2010).
5. Kakizaki F, Aoki K, Miyoshi H, Carrasco N, Aoki M, Taketo MM. CDX transcription factors positively regulate expression of solute carrier family 5, member 8 in the colonic epithelium. *Gastroenterology* **138**, 627-635 (2010).
6. Thorgeirsson TE, *et al.* Sequence variants at CHRN3-CHRNA6 and CYP2A6 affect smoking behavior. *Nature genetics* **42**, 448-453 (2010).
7. Thorgeirsson TE, *et al.* A rare missense mutation in CHRNA4 associates with smoking behavior and its consequences. *Mol Psychiatry* **21**, 594-600 (2016).
8. Gudbjartsson DF, *et al.* Large-scale whole-genome sequencing of the Icelandic population. *Nature genetics* **47**, 435-444 (2015).
